# Supplementary material
Source: ML conference proceedings conference paper supplement (https://openaccess.thecvf.com/content/WACV2022/html/Perez-Yus_Matching_and_Recovering_WACV_2022_paper.html)
Supplement: Supplementary file 2 [file Perez-Yus_Matching_and_Recovering_WACV_2022_supplemental.zip]

Archive with 3 entries (3 files):
- 1211-supp.mp4
- 1211-supp.pdf
- readme.txt
