# Supplementary material
Source: ML conference proceedings conference paper supplement (https://openaccess.thecvf.com/content/WACV2022/html/Perez-Yus_Matching_and_Recovering_WACV_2022_paper.html)
Supplement: Supplementary file 2 [file Perez-Yus_Matching_and_Recovering_WACV_2022_supplemental.zip › readme.txt]

Matching and Recovering 3D People from Multiple Views
WACV 2022
Submission 1211

Format: mp4
Codec: H.264 (x264)
